# Supplementary material for: Evolution of E. coli on [U-13C]Glucose Reveals a Negligible Isotopic Influence on Metabolism and Physiology
Source: PLoS One. 2016 Mar 10;11(3):e0151130. doi: 10.1371/journal.pone.0151130 (PMC4786092; doi:10.1371/journal.pone.0151130)
Supplement: S2 File — (XLSX) [file pone.0151130.s007.xlsx]

## Sheet: ALE
			ALE1			ALE2			ALE3			ALE4			ALE5			ALE6
Mutation	Gene	Protein change	Flask 23	Flask 58	Flask 133	Flask 23	Flask 58	Flask 134	Flask 23	Flask 57	Flask 133	Flask 24	Flask 59	Flask 135	Flask 24	Flask 54	Flask 135	Flask 23	Flask 58	Flask 133
100801 G→T	murC	V13L (GTG→TTG)						X
1090918 G→A	pgaA	Q199* (CAA→TAA)							X
1262865 T→G	lolB/hemA	intergenic (‑142/‑72)																		X
1292220 IS2 (–) +5 bp	hns/tdk	intergenic (‑75/‑526)																		X
1292257 IS1 (+) +8 bp	hns/tdk	intergenic (‑112/‑486)									X
1292261 IS1 (+) +9 bp	hns/tdk	intergenic (‑116/‑481)			X
1292403 IS5 (+) +4 bp	hns/tdk	intergenic (‑258/‑344)															X
1379138 G→C	ycjV	pseudogene (664/957 nt)																		X
1527199 T→C	rhsE	V429A (GTT→GCT)						X												X
1527204 T→C	rhsE	F431L (TTT→CTT)						X												X
1527209 C→T	rhsE	Y432Y (TAC→TAT)						X												X
1527227 C→A	rhsE	G438G (GGC→GGA)						X												X
1527242 C→T	rhsE	L443L (CTC→CTT)						X	X						X					X
1604172 IS2 (+) +5 bp	lsrF	coding (49‑53/876 nt)																	X
2255607 Δ6 bp	pscG	coding (778‑783/939 nt)						X
2468426 Δ1 bp	yfdI	coding (1274/1332 nt)																	X
2767756 +GGCTGTCA	yfjR	coding (32/702 nt)																		X
2807574 T→G	ygaY/ygaZ	intergenic (+59/‑65)												X
2915503 +C	barA	coding (2425/2757 nt)						X
2964844 T→A	ptsP	Q538L (CAG→CTG)												X
3495438 Δ13 bp	nirC	coding (414‑426/807 nt)						X
3813829 A→C	pyrE/rph	intergenic (‑38/+57)					X
3813832 Δ1 bp	pyrE/rph	intergenic (‑41/+54)						X	X				X			X	X
3813852 Δ26 bp	pyrE/rph	intergenic (‑61/+9)		X
3813882 Δ82 bp	pyrE/rph	intergenic			X					X	X			X	X
3813960 C→A	rph	E205* (GAA→TAA)				X
3852320 G→A	emrD	E126K (GAA→AAA)											X
3970053 +CCTGGC	rffD	coding (771/1263 nt)												X
4074795 Δ12 bp	yihY	coding (627‑638/873 nt)													X
4181237 C→T	rpoB	T657I (ACC→ATC)						X
4182832 G→T	rpoB	G1189C (GGT→TGT)	X	X	X		X			X	X	X	X	X		X	X	X
4183563 C→T	rpoC	P64L (CCG→CTG)																	X
4184121 +9 bp	rpoC	coding (749/4224 nt)																		X
4628300 C→T	yjjK	P82P (CCG→CCA)								X
666000 G→T	mrdA	P481T (CCT→ACT)															X
Mutation position given relative to the E. coli K-12 MG1655 reference genome (NCBI accession NC_000913.2)
Flask numbers represent the number of serial propagations of the culture before the colony was isolated for sequencing (Fig S3 shows these points on the fitness trajectories)

## Sheet: reALE
Mutation	Gene	Protein change	reALE1 (Flask 21)	reALE2 (Flask 21)	reALE3 (Flask 21)
1527199 T→C	rhsE	V429A (GTT→GCT)	X
1527204 T→C	rhsE	F431L (TTT→CTT)	X
1527209 C→T	rhsE	Y432Y (TAC→TAT)	X
1527227 C→A	rhsE	G438G (GGC→GGA)	X
1527242 C→T	rhsE	L443L (CTC→CTT)	X	X	X
1581775 G→T	ydeO/yneN	intergenic (‑64/+11)	X
3365537 IS2 (+) +5 bp	yhcF	coding (590‑594/717 nt)			X
3813832 Δ1 bp	pyrE/rph	intergenic (‑41/+54)			X
4185237 A→C	rpoC	D622A (GAC→GCC)	X
4185530 A→C	rpoC	N720H (AAC→CAC)		X
455830 Δ4 bp	tig/clpP	intergenic (+175/‑68)	X
			reALE4 (Flask 45)	reALE5 (Flask 45)	reALE6 (Flask 45)
1292238 IS1 (–) +8 bp	hns/tdk	intergenic (‑93/‑505)	X	X	X
1628622 IS5 (+) +4 bp	ydfI	coding (313‑316/1461 nt)	X	X	X
2222310 IS5 (+) +4 bp	pbpG	coding (580‑583/933 nt)	X	X	X
2751555 Δ1 bp	recN/smpA	intergenic (+77/‑72)	X	X	X
2807783 G→T	ygaZ	E49* (GAA→TAA)	X	X	X
2864864 Δ1 bp	rpoS	coding (710/993 nt)		X
2874700 IS5 (+) +4 bp	iap	coding (98‑101/1038 nt)	X	X	X
3004881 A→C	ygeW	S200R (AGC→CGC)	X	X	X
3813882 Δ82 bp	pyrE/rph	intergenic	X	X	X
4181281 G→A	rpoB	E672K (GAA→AAA)	X	X	X
Mutation position given relative to the E. coli K-12 MG1655 reference genome (NCBI accession NC_000913.2)
Flask numbers represent the number of serial propagations of the culture before the evolution endpoint
Mutations in yellow were present in the 12C pre-evolved strain used to start reALEs 4-6
